# Supplementary material for: The effect of salinity on the biogeochemistry of the coccolithophores with implications for coccolith-based isotopic proxies
Source: Copernicus journal article supplement (doi:10.5194/bg-2018-357), 2018-07-31
Supplement: Supplementary file 1 [file bg-2018-357-supplement.pdf]

|                                              | Salinity | DIC                 | CO <sub>2</sub> aq  | pH          | Temperature | Growth rates      | Coccosphere diameter | Cell diameter | δ <sup>18</sup> O <sub>c</sub> | δ <sup>13</sup> C <sub>c</sub> |
|----------------------------------------------|----------|---------------------|---------------------|-------------|-------------|-------------------|----------------------|---------------|--------------------------------|--------------------------------|
|                                              | psu      | μM kg <sup>-1</sup> | μM kg <sup>-1</sup> | total scale | °C          | day <sup>-1</sup> | μm                   | μm            | ‰ VPDB                         | ‰ VPDB                         |
| <b>RCC1314</b> <i>Gephyrocapsa oceanica</i>  | 29       | 1683.8              | 8.9                 | 8.2         | 15          |                   |                      |               |                                |                                |
|                                              | 29       | 1683.8              | 8.9                 | 8.2         | 15          |                   |                      |               |                                |                                |
|                                              | 31       | 1815.8              | 9.4                 | 8.2         | 15          | 0.52              | 7.16                 | 6.05          | -5.80                          | -12.82                         |
|                                              | 31       | 1815.8              | 9.4                 | 8.2         | 15          | 0.53              | 6.91                 | 6.06          | -5.85                          | -12.88                         |
|                                              | 33       | 1859.4              | 9.4                 | 8.2         | 15          | 0.48              | 6.65                 | 5.87          | -5.62                          | -12.40                         |
|                                              | 33       | 1859.4              | 9.4                 | 8.2         | 15          | 0.42              | 6.63                 | 5.87          | -5.63                          | -12.34                         |
|                                              | 35       | 1989.9              | 9.8                 | 8.2         | 15          | 0.43              | 7.40                 | 6.53          | -5.70                          | -12.81                         |
|                                              | 35       | 1989.9              | 9.8                 | 8.2         | 15          | 0.45              | 6.99                 | 6.50          | -5.79                          | -12.76                         |
|                                              | 37       | 2063.2              | 10.0                | 8.2         | 15          | 0.35              | 7.13                 | 6.66          | -5.74                          | -12.76                         |
|                                              | 37       | 2063.2              | 10.0                | 8.2         | 15          | 0.38              | 7.54                 | 6.46          | -5.81                          | -12.85                         |
|                                              | 39       | 2144.3              | 10.1                | 8.2         | 15          | 0.21              | 7.07                 | 6.96          | -5.91                          | -13.21                         |
|                                              | 39       | 2144.3              | 10.1                | 8.2         | 15          | 0.14              | 7.32                 | 7.26          | -5.83                          | -13.06                         |
| <b>RCC4032</b> <i>Gephyrocapsa ericsonii</i> | 29       | 1683.8              | 8.9                 | 8.2         | 15          | 0.63              | 3.74                 | 3.74          | -5.07                          | -11.38                         |
|                                              | 29       | 1683.8              | 8.9                 | 8.2         | 15          | 0.68              | 3.73                 | 3.78          | -5.15                          | -11.22                         |
|                                              | 31       | 1815.8              | 9.4                 | 8.2         | 15          | 0.65              | 3.86                 | 3.85          |                                |                                |
|                                              | 31       | 1815.8              | 9.4                 | 8.2         | 15          | 0.59              | 3.85                 | 3.85          | -5.02                          | -10.67                         |
|                                              | 33       | 1859.4              | 9.4                 | 8.2         | 15          | 0.74              | 3.83                 | 3.90          | -5.14                          | -10.84                         |
|                                              | 33       | 1859.4              | 9.4                 | 8.2         | 15          | 0.75              | 3.88                 | 3.91          | -4.99                          | -10.79                         |
|                                              | 35       | 1989.9              | 9.8                 | 8.2         | 15          | 0.78              | 3.97                 | 3.93          | -5.02                          | -10.95                         |
|                                              | 35       | 1989.9              | 9.8                 | 8.2         | 15          | 0.78              | 3.99                 | 3.94          | -5.03                          | -10.92                         |
|                                              | 37       | 2063.2              | 10.0                | 8.2         | 15          | 0.59              | 4.09                 | 3.91          | -4.94                          | -11.38                         |
|                                              | 37       | 2063.2              | 10.0                | 8.2         | 15          | 0.54              | 4.04                 | 3.96          | -4.97                          | -11.44                         |
|                                              | 39       | 2144.3              | 10.1                | 8.2         | 15          |                   |                      |               |                                |                                |
|                                              | 39       | 2144.3              | 10.1                | 8.2         | 15          |                   |                      |               |                                |                                |
| <b>RCC1212</b> <i>Emiliania huxleyi</i>      | 29       | 1683.8              | 8.9                 | 8.2         | 15          | 0.33              | 5.79                 | 5.17          | -4.67                          | -10.03                         |
|                                              | 29       | 1683.8              | 8.9                 | 8.2         | 15          | 0.29              | 5.81                 | 5.14          | -4.69                          | -10                            |
|                                              | 31       | 1815.8              | 9.4                 | 8.2         | 15          | 0.63              | 6.02                 | 5.51          | -5.10                          | -9.88                          |
|                                              | 31       | 1815.8              | 9.4                 | 8.2         | 15          | 0.64              | 6.00                 | 5.50          | -5.11                          | -9.70                          |
|                                              | 33       | 1859.4              | 9.4                 | 8.2         | 15          | 0.73              | 6.25                 | 5.25          | -5.03                          | -10.01                         |
|                                              | 33       | 1859.4              | 9.4                 | 8.2         | 15          | 0.77              | 6.23                 | 5.25          | -4.97                          | -10.00                         |
|                                              | 35       | 1989.9              | 9.8                 | 8.2         | 15          | 0.72              | 6.05                 | 5.67          | -4.97                          | -10.15                         |
|                                              | 35       | 1989.9              | 9.8                 | 8.2         | 15          | 0.70              | 6.30                 | 5.47          | -4.84                          | -10.06                         |
|                                              | 37       | 2063.2              | 10.0                | 8.2         | 15          | 0.70              | 5.88                 | 5.00          | -4.77                          | -10.56                         |
|                                              | 37       | 2063.2              | 10.0                | 8.2         | 15          | 0.68              | 5.94                 | 5.00          | -4.78                          | -10.62                         |
|                                              | 39       | 2144.3              | 10.1                | 8.2         | 15          | 0.71              | 6.10                 | 5.48          | -4.91                          | -10.31                         |
|                                              | 39       | 2144.3              | 10.1                | 8.2         | 15          | 0.62              | 6.03                 | 5.60          | -4.74                          | -10.72                         |
| <b>RCC1256</b> <i>Emiliania huxleyi</i>      | 29       | 1683.8              | 8.9                 | 8.2         | 15          | 0.24              | 5.93                 | 5.56          | -4.64                          | -11.52                         |
|                                              | 29       | 1683.8              | 8.9                 | 8.2         | 15          | 0.30              | 5.84                 | 5.45          |                                | -11.31                         |
|                                              | 31       | 1815.8              | 9.4                 | 8.2         | 15          | 0.48              | 4.96                 | 4.55          | -4.69                          | -11.77                         |
|                                              | 31       | 1815.8              | 9.4                 | 8.2         | 15          | 0.57              | 4.90                 | 4.46          | -4.86                          | -11.81                         |
|                                              | 33       | 1859.4              | 9.4                 | 8.2         | 15          | 0.67              | 4.99                 | 4.52          | -4.82                          | -10.98                         |
|                                              | 33       | 1859.4              | 9.4                 | 8.2         | 15          | 0.67              | 4.95                 | 4.59          | -4.69                          | -10.89                         |
|                                              | 35       | 1989.9              | 9.8                 | 8.2         | 15          | 0.58              | 4.85                 | 4.44          | -4.56                          | -11.94                         |
|                                              | 35       | 1989.9              | 9.8                 | 8.2         | 15          | 0.57              | 4.82                 | 4.45          |                                |                                |
|                                              | 37       | 2063.2              | 10.0                | 8.2         | 15          | 0.54              | 4.80                 | 4.41          | -4.67                          | -12.90                         |
|                                              | 37       | 2063.2              | 10.0                | 8.2         | 15          | 0.50              | 4.84                 | 4.52          |                                |                                |
|                                              | 39       | 2144.3              | 10.1                | 8.2         | 15          | 0.38              | 5.53                 | 5.13          | -4.81                          | -11.75                         |
|                                              | 39       | 2144.3              | 10.1                | 8.2         | 15          | 0.27              | 5.03                 | 4.70          | -4.70                          | -11.50                         |
